# Supplementary material for: Infrared Characterization of the Bidirectional Oxygen-Sensitive [Nife]-Hydrogenase from <em>E. Coli</em>
Source: Preprints.org preprint supplement (doi:10.20944/preprints201810.0368.v1), 2018-10-16
Supplement: Supplementary file 1 [file supplementary]

*Supporting Information*

# **Infrared Characterization of the Bidirectional Oxygen-Sensitive [Nife]-Hydrogenase from *E. Coli***

**Moritz Senger<sup>1</sup>, Konstantin Laun<sup>1</sup>, Basem Soboh<sup>2</sup>, and Sven T. Stripp<sup>1,\*</sup>**

<sup>1</sup> Department of Physics, Experimental Molecular Biophysics, Freie Universität Berlin, 14195 Berlin, Germany; sven.stripp@fu-berlin.de

<sup>2</sup> Department of Physics, Genetic Biophysics, Freie Universität Berlin, 14195 Berlin, Germany; basem.soboh@fu-berlin.de

\* Correspondence: sven.stripp@fu-berlin.de; Tel.: +49-030-838-55069

## **Contents**

Figure S1 <sup>13</sup>CO isotope editing

Figure S2 Further H<sub>2</sub> titrations and Ni-R band assignment

Figure S3 Further CO titrations

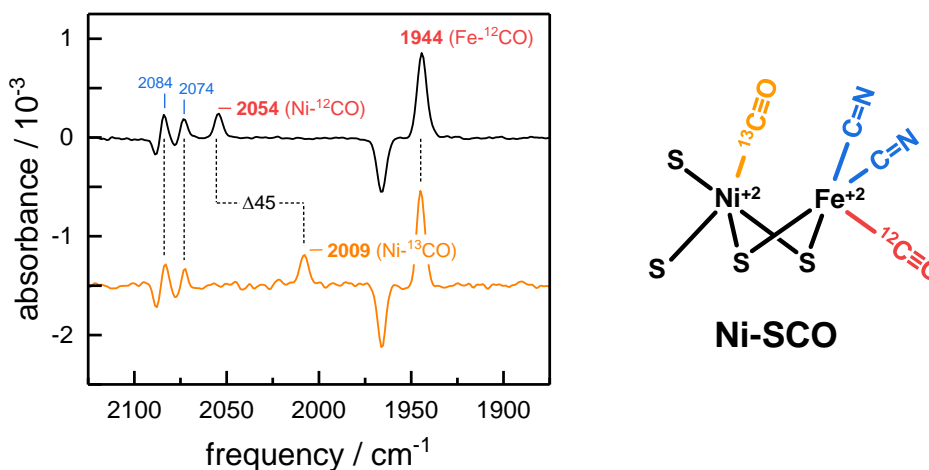

**Figure S1.**  $^{13}\text{C}$ O isotope editing. The black difference spectrum shows the enrichment of Ni-SCO over Ni-C and Ni-SI upon  $^{12}\text{C}$ O binding the nickel ion (see main script). In the presence of  $^{13}\text{C}$ O, the Ni-CO signal shifts from 2054 to 2009  $\text{cm}^{-1}$  (orange difference spectrum). The observed shift of 45  $\text{cm}^{-1}$  to lower frequencies is explained by the difference in reduced mass  $\mu = \frac{m_1 m_2}{m_1 + m_2}$  between  $^{12}\text{C}$ O and  $^{13}\text{C}$ O. The  $\text{Fe}(\text{CN})_2\text{CO}$  signature remains unaffected by the isotope editing, which proves the presence of an individual CO ligand at the nickel site.

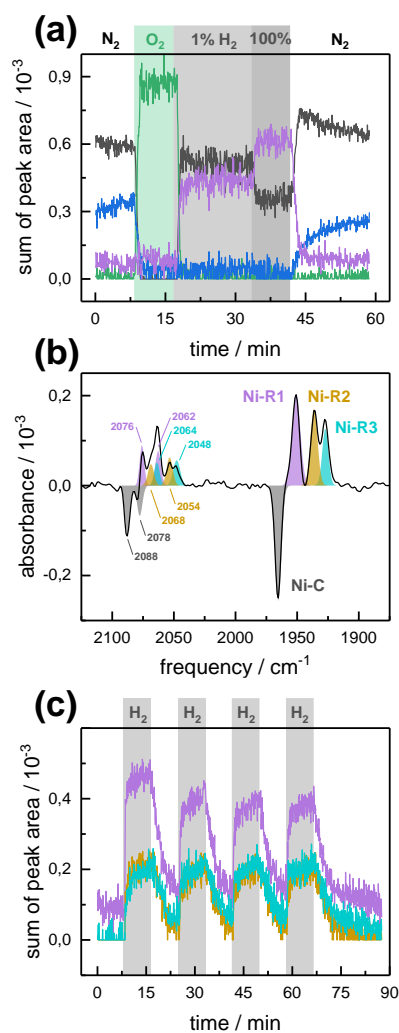

**Figure S2.** Further H<sub>2</sub> titrations and Ni-R band assignment. **(a)** In order to assign the Fe(CN)<sub>2</sub>CO signature of the Ni-R states the following procedure was attempted. First, the sample was brought in contact with 1% O<sub>2</sub> to homogenize the film and enrich Ni-B over the as-isolated mixture of Ni-C and Ni-SI (see Fig. 6 in the main script). Second, O<sub>2</sub> was replaced by 1% H<sub>2</sub> to reductively activate the enzyme. The reduced species Ni-C and Ni-R were found to dominate the spectrum with no increase of the oxidized Ni-SI in the presence of H<sub>2</sub>. However, the H<sub>2</sub> – O<sub>2</sub> difference spectrum still included the negative bands of Ni-B. Although the film was completely reactivated with 1% H<sub>2</sub>, a further increase of Ni-R over Ni-C was observed by switching the gas stream to 100% H<sub>2</sub>. **(b)** “100% H<sub>2</sub> – 1% H<sub>2</sub>” difference spectrum that depicts the increase of Ni-R1 – R3 over Ni-C. The Fe(CN)<sub>2</sub>CO signature of Ni-C was identified before (see main script). Based on the singular peaks at 2076, 2054, and 2048 cm<sup>-1</sup> and the observation that both CO and CN<sup>-</sup> bands shift in the same direction, a unique fit was achieved for the Fe(CN)<sub>2</sub>CO assignment of Ni-R1 – R3 (see Tab. 1 in the main script). **(c)** This data was used to describe the concomitant increase and decrease of R-states, e.g., depending on the presence or absence of H<sub>2</sub> from the carrier gas.

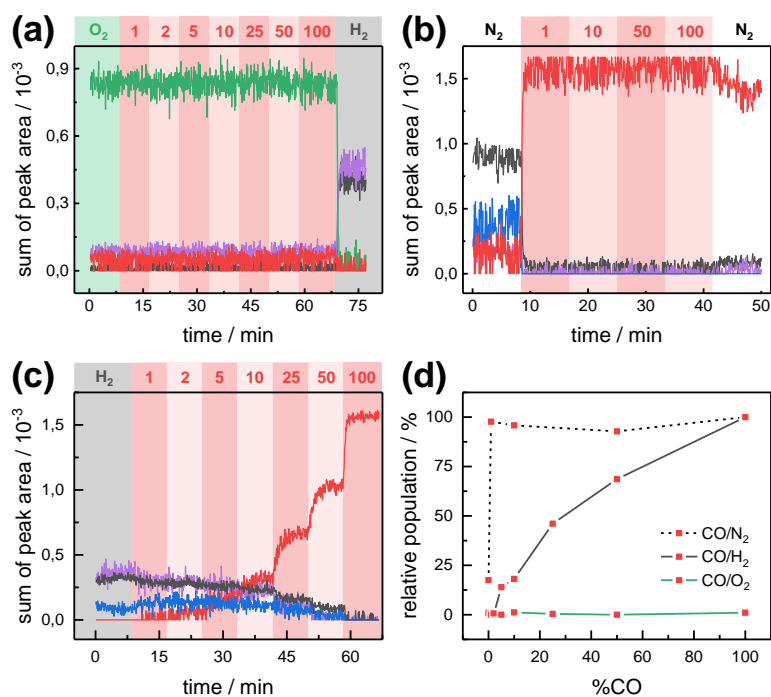

**Figure S3.** Further CO titrations. **(a)** In the presence of  $O_2$  carrier gas, no CO inhibition was observed even when the gas stream was switched to 100% CO. The reaction with  $O_2$  very efficiently removes Ni-SI from the equilibrium of species. Therefore, CO cannot bind to the [NiFe] active site. **(b)** With  $N_2$  as carrier gas, 1% CO in the gas stream completely converts the film into Ni-SCO. The mixture of Ni-C and Ni-SI (characteristic for HYD-2 under inert gas) facilitates an immediate conversion into Ni-SCO in the presence of CO. **(c)** With  $H_2$  as carrier gas, an apparent decrease in the CO affinity is observed (see main script). **(d)** When the relative population of Ni-SCO is plotted against CO ambient partial pressure, the differences in CO affinity as a function of carrier gas can be visualized in a single graph.
